# Supplementary material for: Investigation on electrocatalytic performance and material degradation of an N-doped graphene-MOF nanocatalyst in emulated electrochemical environments
Source: Royal Society of Chemistry journal article supplement (doi:10.1039/d3im00044c), 2023-01-01
Supplement: d3im00044c1.pdf [file d3im00044c1.pdf]

## Investigation on Electrocatalytic Performance and Material Degradation of N-doped Graphene-MOF Nanocatalyst in Emulated Electrochemical Environments

Niladri Talukder,<sup>a</sup> Yudong Wang,<sup>a</sup> Bharath Babu Nunna,<sup>b</sup> Xiao Tong,<sup>c</sup> Jorge Anibal Boscoboinik,<sup>c</sup> and Eon Soo Lee <sup>\*a</sup>

<sup>a</sup> Advanced Energy Systems and Microdevices Laboratory, Department of Mechanical and Industrial Engineering, New Jersey Institute of Technology, Newark, NJ, 07102, United States.

<sup>b</sup> Department of Mechanical Engineering, Weber State University, Ogden, Utah, 84408, United States.

<sup>c</sup> The Center for Functional Nanomaterials, Brookhaven National Laboratory, Upton, New York 11973, United States.

\* Corresponding Author: [eonsoo.lee@njit.edu](mailto:eonsoo.lee@njit.edu)

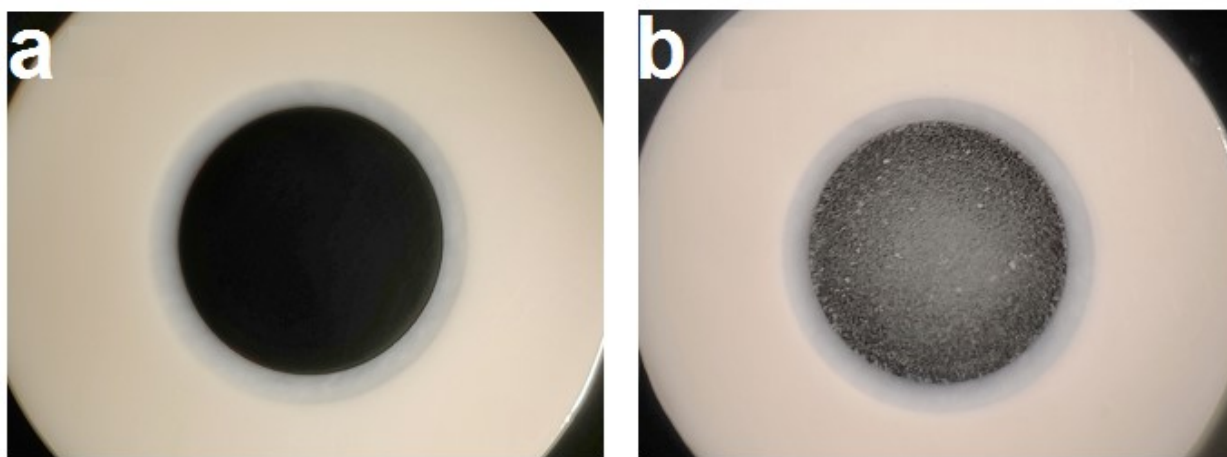

**Fig. S-1:** (a) uncoated working electrode surface; (b) N-G/MOF catalyst coated working electrode surface.

**Table SD-1:** Averaged relative ratios of the elements of N-G/MOF nanocatalyst samples obtained by multiple UHV-XPS Survey Scan.

|                                                         | H <sub>2</sub> O <sub>2</sub><br>Concentration | Oxygen,<br>O % | Carbon,<br>C % | Nitrogen,<br>N % | Zirconium,<br>Zr % | Zinc,<br>Zn% | Iron,<br>Fe% |
|---------------------------------------------------------|------------------------------------------------|----------------|----------------|------------------|--------------------|--------------|--------------|
| Fresh N-G/MOF                                           | 0.00                                           | 46.86          | 36.06          | 7.17             | 5.36               | 2.06         | 2.49         |
| 0.01 M H <sub>2</sub> O <sub>2</sub><br>Treated N-G/MOF | 0.01                                           | 46.15          | 38.12          | 8.84             | 4.19               | 1.79         | 0.93         |
| 0.1 M H <sub>2</sub> O <sub>2</sub><br>Treated N-G/MOF  | 0.1                                            | 52.51          | 31.93          | 5.03             | 5.68               | 2.79         | 2.06         |
| 0.5 M H <sub>2</sub> O <sub>2</sub><br>Treated N-G/MOF  | 0.5                                            | 54.29          | 26.32          | 5.16             | 7.59               | 3.29         | 3.35         |
| 1 M H <sub>2</sub> O <sub>2</sub> Treated<br>N-G/MOF    | 1                                              | 53.52          | 28.44          | 5.55             | 6.78               | 2.88         | 2.83         |
| 5 M H <sub>2</sub> O <sub>2</sub> Treated<br>N-G/MOF    | 5                                              | 59.28          | 24.35          | 3.45             | 7.13               | 2.89         | 2.91         |
